# Supplementary material for: Longevity-Associated Variant of BPIFB4 Confers Neuroprotection in the STHdh Cell Model of Huntington Disease
Source: MDPI journal article supplement (doi:10.3390/ijms232315313), 2022-12-05
Supplement: s1 [file s1]

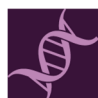

Article

# Longevity-Associated Variant of BPIFB4 Confers Neuroprotection in the STHdh Cell Model of Huntington Disease

Monica Cattaneo <sup>1</sup>, Anna Maciag <sup>1</sup>, Maria Serena Milella <sup>1</sup>, Elena Ciaglia <sup>2</sup>, Antonino Bruno <sup>3,4</sup>  
and Annibale Alessandro Puca <sup>1,2,\*</sup>

<sup>1</sup> Cardiovascular Department, IRCCS MultiMedica, 20138 Milan, Italy

<sup>2</sup> Department of Medicine, Surgery and Dentistry “Scuola Medica Salernitana,” University of Salerno, 84081 Salerno, Italy

<sup>3</sup> Laboratory of Innate Immunity, Unit of Molecular Pathology, Biochemistry and Immunology, IRCCS MultiMedica, 20138 Milan, Italy

<sup>4</sup> Laboratory of Immunology and General Pathology, Department of Biotechnologies and Life Sciences (DBSV), University of Insubria, 20138 Varese, Italy

\* Correspondence: apuca@unisa.it

**Abstract:** Huntington’s disease

**Precursors\_STHdh<sup>Q111/111</sup>\_E**

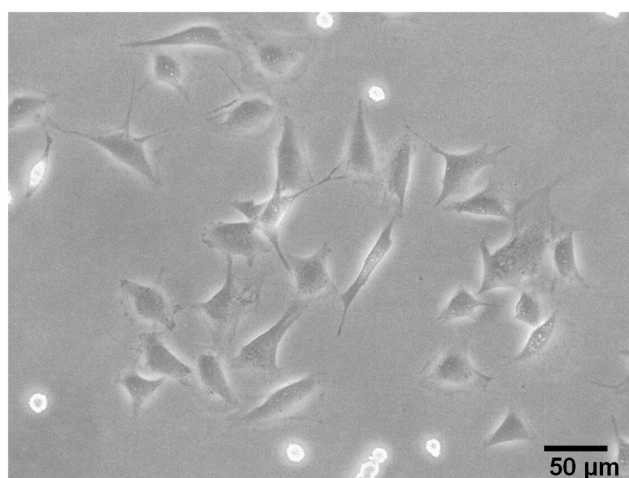

**Neuron-like\_STHdh<sup>Q111/111</sup>\_E**

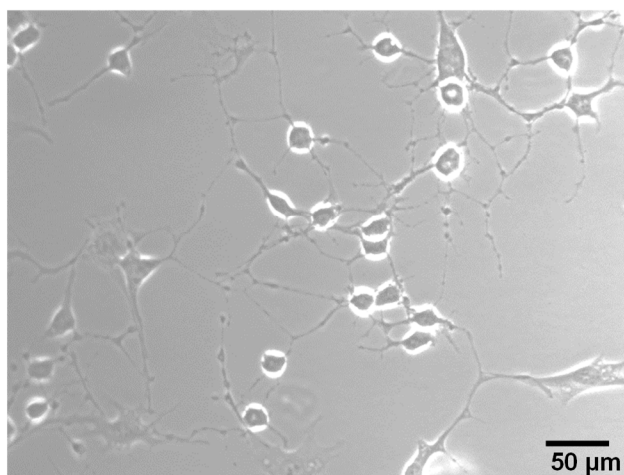

**Figure S1.** Morphological changes acquired by the STHdh<sup>Q111/111</sup>\_E cells after the differentiation into neuron-like cells. Compared to precursors, the differentiated cells acquired a neuron-like features characterized by elongated branching structures stemming from the cell bodies.

**Table S1.** Primers employed in Realtime RT-PCR experiments.

| Gene         | Forward                | Reverse                 |
|--------------|------------------------|-------------------------|
| mouse FosB   | ACCTGTCTTCGGTGGACTCCTT | TGGCTGGTTGTGATTGCCGTGA  |
| mouse Nur77  | GTGCAGTCTGTGGTGACAATGC | CAGGCAGATGTACTTGGCGCTT  |
| mouse Fos    | GGGAATGGTGAAGACCGTGTCA | GCAGCCATCTTATTCCGTTCCC  |
| mouse Npas4  | TAGCCCTACTGGACGTTTC    | CGGTAGTGTTGAGAAGAAGCTT  |
| mouse BPIFB4 | CAATTCAGAAGAGTGACGCCT  | CGAGGATGAGTCTGCCGCCGAT  |
| mouse H3.1   | CTGATCCGCAAGCTGCCGTTT  | GTTGGTGTCTCTCAAACAGACCC |

**Table S2.** Antibodies and experimental conditions employed for Western blot.

| ANTIGEN          | COMPANY<br>(CATALOG N°)       | DILUTION | HOST AND<br>CLONALITY | INCUBATION TIME<br>AND<br>TEMPERATURE | SECONDARY<br>ANTIBODY                  | INCUBATION<br>TIME |
|------------------|-------------------------------|----------|-----------------------|---------------------------------------|----------------------------------------|--------------------|
| <b>BPIFB4</b>    | Clinsciences<br>(Custom Made) | 1:1000   | Rabbit<br>Polyclonal  | 16 hr, +4°C                           | ECL Rabbit IgG<br>HPR linked<br>1:3000 | 1 hr, TM           |
| <b>YH2AX</b>     | Biolegend;<br>613402          | 1:1000   | Mouse<br>Monoclonal   | 16 hr, +4°C                           | ECL Mouse IgG<br>HPR linked<br>1:3000  | 1 hr, TM           |
| <b>H2AX</b>      | Cell Signaling;<br>7631       | 1:1000   | Mouse<br>Monoclonal   | 16 hr, +4°C                           | ECL Mouse IgG<br>HPR linked<br>1:3000  | 1 hr, TM           |
| <b>Caspase-3</b> | Cell Signaling;<br>14220      | 1:1000   | Rabbit<br>Polyclonal  | 16 hr, +4°C                           | ECL Rabbit IgG<br>HPR linked<br>1:3000 | 1 hr, TM           |
| <b>H3K9me3</b>   | Abcam;<br>ab8898              | 1:500    | Rabbit<br>Polyclonal  | 16 hr, +4°C                           | ECL Rabbit IgG<br>HPR linked<br>1:3000 | 1 hr, TM           |
| <b>H3</b>        | Abcam;<br>ab1791              | 1:1000   | Rabbit<br>Polyclonal  | 16 hr, +4°C                           | ECL Rabbit IgG<br>HPR linked<br>1:3000 | 1 hr, TM           |
| <b>β-actin</b>   | Abcam;<br>ab6276              | 1:3000   | Mouse<br>Monoclonal   | 16 hr, +4°C                           | ECL Mouse IgG<br>HPR linked<br>1:3000  | 1 hr, TM           |
| <b>Vinculin</b>  | Sigma;<br>V9131               | 1:1000   | Mouse<br>Monoclonal   | 16 hr, +4°C                           | ECL Mouse IgG<br>HPR linked<br>1:3000  | 1 hr, TM           |
